# Supplementary material for: Baby Steps: Using Intervention Mapping to Develop a Sustainable Perinatal Physical Activity Healthcare Intervention
Source: MDPI journal article supplement (doi:10.3390/ijerph18115869), 2021-05-30
Supplement: s1 [file s1]

Anna M. Dieberger; Mireille N. M. van Poppel; Estelle D. Watson

Baby steps: Using Intervention Mapping to develop a sustainable perinatal physical activity healthcare intervention

**Supplementary File 2:** Needs assessment survey for community health workers

## Survey CHWs

|         |  |
|---------|--|
| ID Code |  |
|---------|--|

|                                                                                                                                                                       |                                                  |                                    |                                                |                                      |                                              |
|-----------------------------------------------------------------------------------------------------------------------------------------------------------------------|--------------------------------------------------|------------------------------------|------------------------------------------------|--------------------------------------|----------------------------------------------|
| <b>Please tick the response that most closely fits your demographics. If the choices given do not fit your situation, please feel free to write in one that does.</b> |                                                  |                                    |                                                |                                      |                                              |
| 1. How many years have you been working as a community health worker?                                                                                                 | <input type="checkbox"/> <2 years                | <input type="checkbox"/> 2-5 years | <input type="checkbox"/> 5-10 years            | <input type="checkbox"/> 10-20 years | <input type="checkbox"/> >20                 |
| 2. What is your gender?                                                                                                                                               | <input type="checkbox"/> Male                    | <input type="checkbox"/> Female    |                                                |                                      |                                              |
| 3. What is your race?                                                                                                                                                 | <input type="checkbox"/> Caucasian               | <input type="checkbox"/> African   | <input type="checkbox"/> Indian                | <input type="checkbox"/> Coloured    | Other _____                                  |
| 4. What is your age?                                                                                                                                                  |                                                  |                                    |                                                |                                      |                                              |
| 5. On a scale of 1-5 how would you rate your skills and knowledge needed to be a community health worker?                                                             | <input type="checkbox"/> 1<br>Not highly skilled | <input type="checkbox"/> 2         | <input type="checkbox"/> 3<br>Somewhat skilled | <input type="checkbox"/> 4           | <input type="checkbox"/> 5<br>Highly skilled |
| Please describe how you would rate your skills in the following roles                                                                                                 | Beginner                                         | Intermediate                       | Advanced                                       |                                      |                                              |
| 6. Communication skills                                                                                                                                               | <input type="checkbox"/>                         | <input type="checkbox"/>           | <input type="checkbox"/>                       |                                      |                                              |
| 7. Interpersonal skills                                                                                                                                               | <input type="checkbox"/>                         | <input type="checkbox"/>           | <input type="checkbox"/>                       |                                      |                                              |
| 8. Advocating for individual and community needs                                                                                                                      | <input type="checkbox"/>                         | <input type="checkbox"/>           | <input type="checkbox"/>                       |                                      |                                              |
| 9. Organizational skills                                                                                                                                              | <input type="checkbox"/>                         | <input type="checkbox"/>           | <input type="checkbox"/>                       |                                      |                                              |
| 10. Assuring that people get the services they need                                                                                                                   | <input type="checkbox"/>                         | <input type="checkbox"/>           | <input type="checkbox"/>                       |                                      |                                              |
| 11. Broad knowledge about community and health issues                                                                                                                 | <input type="checkbox"/>                         | <input type="checkbox"/>           | <input type="checkbox"/>                       |                                      |                                              |
| 12. Providing direct services                                                                                                                                         | <input type="checkbox"/>                         | <input type="checkbox"/>           | <input type="checkbox"/>                       |                                      |                                              |
| 13. Teaching skills                                                                                                                                                   | <input type="checkbox"/>                         | <input type="checkbox"/>           | <input type="checkbox"/>                       |                                      |                                              |
| 14. Providing culturally appropriate health education                                                                                                                 | <input type="checkbox"/>                         | <input type="checkbox"/>           | <input type="checkbox"/>                       |                                      |                                              |
| 15. Informal counselling and social support                                                                                                                           | <input type="checkbox"/>                         | <input type="checkbox"/>           | <input type="checkbox"/>                       |                                      |                                              |
| 16. Capacity building skills                                                                                                                                          | <input type="checkbox"/>                         | <input type="checkbox"/>           | <input type="checkbox"/>                       |                                      |                                              |
| 17. Cultural mediation between communities and health and services                                                                                                    | <input type="checkbox"/>                         | <input type="checkbox"/>           | <input type="checkbox"/>                       |                                      |                                              |

|                                                                                                                                                                                                              |                                           |                                                |                                             |  |  |
|--------------------------------------------------------------------------------------------------------------------------------------------------------------------------------------------------------------|-------------------------------------------|------------------------------------------------|---------------------------------------------|--|--|
| <b>For the following questions, <u>physical Activity</u> refers to any activity that you do from a low intensity level, such as walking, to a high intensity level, such as playing a competitive sport.</b> |                                           |                                                |                                             |  |  |
| 18. Are you familiar with the guidelines on how much physical activity you should do to be healthy?                                                                                                          | <input type="checkbox"/> Yes              | <input type="checkbox"/> No                    |                                             |  |  |
| 19. How many <i>minutes</i> of physical activity should one do <u>per week</u> to gain health benefits?                                                                                                      | Minutes / week                            |                                                |                                             |  |  |
| 20. At what <i>intensity</i> should the activity be done?                                                                                                                                                    | <input type="checkbox"/><br>Low intensity | <input type="checkbox"/><br>Moderate intensity | <input type="checkbox"/><br>Heavy intensity |  |  |
| 21. How would you measure intensity whilst exercising?                                                                                                                                                       |                                           |                                                |                                             |  |  |
| 22. Provide an example of an activity for each intensity level                                                                                                                                               |                                           |                                                |                                             |  |  |
|                                                                                                                                                                                                              |                                           |                                                |                                             |  |  |
| 23. How many days per week should aerobic exercise be performed? (exercise that increases your heart and breathing rate such as walking, cycling)                                                            |                                           |                                                |                                             |  |  |
| 24. How many days per week should strength/resistance exercise be performed? (such as using weights or doing squats)                                                                                         |                                           |                                                |                                             |  |  |
| 25. How many days per week should stretching exercises be performed?                                                                                                                                         |                                           |                                                |                                             |  |  |

**Please tick the response that most closely fits your feelings toward the statement given. If examples are requested, please write all those that you feel apply in the space provided.**

26. Physical activity / exercising is beneficial for your health.

- ☐ Strongly agree      ☐ Agree      ☐ Disagree      ☐ Strongly disagree

27. What do you feel are the main benefits of physical activity?

- |                                                                |                                                       |
|----------------------------------------------------------------|-------------------------------------------------------|
| <input type="checkbox"/> Decreased risk of high blood pressure | <input type="checkbox"/> Better posture               |
| <input type="checkbox"/> Decreases risk of Diabetes            | <input type="checkbox"/> Increased fitness levels     |
| <input type="checkbox"/> Decreased risk of high cholesterol    | <input type="checkbox"/> Increased strength levels    |
| <input type="checkbox"/> Decreased risk of heart attack        | <input type="checkbox"/> Improved self-image          |
| <input type="checkbox"/> Decreased risk of stroke              | <input type="checkbox"/> Better sleeping patterns     |
| <input type="checkbox"/> Decreased risk of breast cancer       | <input type="checkbox"/> Decreased risk of depression |
| <input type="checkbox"/> Improved mood                         | <input type="checkbox"/> Improved ability to move     |
| <input type="checkbox"/> Weight management                     | <input type="checkbox"/> Better quality of life       |
|                                                                | <input type="checkbox"/> Other: _____                 |

28. Any amount of physical activity is beneficial to health.

- ☐ Strongly agree      ☐ Agree      ☐ Disagree      ☐ Strongly disagree

29. Only vigorous/heavy activity is beneficial to health.

- ☐ Strongly agree      ☐ Agree      ☐ Disagree      ☐ Strongly disagree

30. Promoting physical activity is an important part of my job as a community health worker.

- ☐ Strongly agree      ☐ Agree      ☐ Disagree      ☐ Strongly disagree

31. I regularly advise my community about the benefits of physical activity

- ☐ Strongly agree      ☐ Agree      ☐ Disagree      ☐ Strongly disagree

32. How do you do this (provide examples)

---

---

---

---

33. I have sufficient knowledge to advice people about physical activity.

- ☐ Strongly agree      ☐ Agree      ☐ Disagree      ☐ Strongly disagree

34. I believe that I can help the community to increase their physical activity levels.

- ☐ Strongly agree      ☐ Agree      ☐ Disagree      ☐ Strongly disagree

35. Do you recommend exercise / physical activity to your patients?

- ☐ Yes      ☐ No -- If no, please skip to question 37.

a. What percentage of patients do you recommend physical activity /exercise?

- ☐ 25%      ☐ 50%      ☐ 75%      ☐ All my patients

b. For what reasons would you NOT recommend physical activity / exercise?

c. If yes, what types of exercise do you recommend for people in your community? (Please tick all that apply; feel free to add others.)

- ☐ Walking      ☐ Running      ☐ Swimming      ☐ Cycling      ☐ Aerobics

Other 

---

---

36. What percentage of your patients in the community asks about physical activity?

- ☐ None      ☐ 25%      ☐ 50%      ☐ 75%      ☐ All of them

37. Are you aware of any exercise classes or physical activity programmes in your area?

☐ Yes

☐ No

If yes, please describe them: \_\_\_\_\_

\_\_\_\_\_

\_\_\_\_\_

If no, please skip question (a) below.

a. If yes, do you recommend people to go to any of these opportunities?

☐ Never

☐ Seldom

☐ Often

☐ Always

**Please provide us with information regarding your training needs and experiences regarding physical activity**

38. Have you ever received formal training in PA/exercise?

☐ Yes

☐ No

a. If yes, how long was this training?

\_\_\_\_\_

\_\_\_\_\_

b. Where did this training take place?

\_\_\_\_\_

\_\_\_\_\_

c. Who provided this training?

\_\_\_\_\_

\_\_\_\_\_

39. How interested would you be in receiving formal training on physical activity / exercise

☐ Not interested      ☐ Slightly interested      ☐ Interested      ☐ Very interested

40. How would you like to receive training in PA/exercise?

---

---

41. What type of things would you like to learn about in terms of PA/exercise?

---

---

42. How likely would you be to apply training in PA/exercise in your work with patients in the community setting?

☐ Not likely      ☐ Likely      ☐ Extremely likely
