# Supplementary material for: Baby Steps: Using Intervention Mapping to Develop a Sustainable Perinatal Physical Activity Healthcare Intervention
Source: Int J Environ Res Public Health. 2021 May 30;18(11):5869. doi: 10.3390/ijerph18115869 (PMC8198094; doi:10.3390/ijerph18115869)
Supplement: Supplementary file 1 [file ijerph-18-05869-s001.zip]

Archive with 4 entries (4 files):
- Supp_1_TiDieR.pdf
- Supp_2_CHWsurvey.pdf
- Supp_3_Table.pdf
- Supp_4_Survey.pdf
